# Supplementary material for: Still Something to Discover: Novel Insights into Escherichia coli Phage Diversity and Taxonomy
Source: MDPI journal article supplement (doi:10.3390/v11050454), 2019-05-17
Supplement: s1 [file s1]

**Table S1.** *E. coli* strains for phage isolation, characterization and propagation

| strain designation | origin      | serotype                   | remarks                                                    |
|--------------------|-------------|----------------------------|------------------------------------------------------------|
| DSM 613 (B)        | ND          | O7:H <sup>NT</sup>         | laboratory strain, risk group 1                            |
| DSM 498 (K-12)     | ND          | O16:H48                    | laboratory strain, risk group 1                            |
| DSM 101101         | human urine | O25:H4                     | ESBL, risk group 2                                         |
| DSM 101102         | human       | O102:H <sup>NT</sup>       | ESBL, risk group 2                                         |
| DSM 101103         | human       | O <sup>NT</sup> :H4        | ESBL, risk group 2                                         |
| DSM 101104         | human urine | O7:H5                      | ESBL, risk group 2                                         |
| DSM 101105         | human       | O <sup>NT</sup> :H4        | ESBL, risk group 2                                         |
| DSM 101106         | human urine | O75:H9 var. 7              | ESBL, risk group 2                                         |
| DSM 101107         | human urine | O <sup>rough</sup> :H6     | ESBL, risk group 2                                         |
| DSM 101108         | human urine | O25:H4                     | ESBL, risk group 2                                         |
| DSM 101109         | human urine | O25:H4                     | ESBL, risk group 2                                         |
| DSM 101110         | human       | O <sup>NT</sup> :H9 var. 7 | ESBL, risk group 2                                         |
| DSM 101111         | human       | O25:H4                     | ESBL <i>bla</i> CTX-M1, -M15, risk group 2                 |
| DSM 101112         | human       | O25:H4                     | ESBL <i>bla</i> CTX-M1, -M15, risk group 2                 |
| DSM 101113         | human       | O25:H4                     | ESBL <i>bla</i> CTX-M1, -M15, <i>bla</i> TEM, risk group 2 |
| DSM 101114         | human       | O25:H4                     | ESBL <i>bla</i> CTX-M1, -M15, <i>bla</i> TEM, risk group 2 |
| DSM 101115         | human       | O75:H9 var. 7              | ESBL, risk group 2                                         |
| DSM 101116         | human       | O <sup>NT</sup> :H15       | ESBL, risk group 2                                         |
| DSM 101117         | human urine | O25:H4                     | ESBL, risk group 2                                         |
| DSM 101118         | human       | O25:H4                     | ESBL, risk group 2                                         |
| DSM 101120         | human       | O25:H4                     | ESBL <i>bla</i> CTX-M1, -M15, <i>bla</i> TEM, risk group 2 |
| DSM 101121         | human       | O <sup>NT</sup> :H1        | ESBL <i>bla</i> CTX-M1, -M15, <i>bla</i> TEM, risk group 2 |
| DSM 101122         | human       | O7:H5                      | ESBL <i>bla</i> CTX-M1, -M15, <i>bla</i> TEM, risk group 2 |
| DSM 101123         | human       | O7:H5                      | ESBL, risk group 2                                         |
| DSM 101124         | human urine | O <sup>NT</sup> :H15       | ESBL <i>bla</i> CTX-M1, -M15, risk group 2                 |
| DSM 101125         | human       | O <sup>NT</sup> :H9 var. 7 | ESBL, risk group 2                                         |
| DSM 101126         | human urine | O75:H9 var. 7              | ESBL, risk group 2                                         |
| DSM 101127         | human       | O25:H4                     | ESBL, risk group 2                                         |
| DSM 101128         | human       | O25:H4                     | ESBL, risk group 2                                         |
| DSM 101129         | human urine | O25:H4                     | ESBL, risk group 2                                         |
| DSM 101131         | human urine | O25:H4                     | ESBL, risk group 2                                         |
| DSM 101132         | human       | O <sup>rough</sup> :H4     | ESBL, risk group 2                                         |
| DSM 101133         | human       | O <sup>NT</sup> :H18       | ESBL, risk group 2                                         |
| DSM 101134         | human urine | O7:H5                      | ESBL, risk group 2                                         |
| DSM 101135         | human urine | O25:H4                     | ESBL, risk group 2                                         |
| DSM 101136         | human urine | O25:H4                     | ESBL, risk group 2                                         |
| DSM 101137         | human       | O <sup>NT</sup> :H18       | ESBL, risk group 2                                         |
| DSM 101138         | human       | O1:H6                      | ESBL, risk group 2                                         |
| DSM 101139         | human       | O1:H6                      | ESBL <i>bla</i> CTX-M1, -M15, risk group 2                 |
| DSM 101140         | human       | O <sup>NT</sup> :H6        | ESBL, risk group 2                                         |
| DSM 101141         | human       | O15:H1                     | ESBL, risk group 2                                         |
| DSM 101142         | human       | O <sup>NT</sup> :H4        | ESBL, risk group 2                                         |

|                      |                     |                      |                                                                                                                                                                        |
|----------------------|---------------------|----------------------|------------------------------------------------------------------------------------------------------------------------------------------------------------------------|
| DSM 103242           | chicken carcass     | O138:H48             | ESBL <i>blaSHV</i> , risk group 2                                                                                                                                      |
| DSM 103243           | chicken carcass     | O25:H48              | ESBL <i>blaSHV</i> , risk group 2                                                                                                                                      |
| DSM 103244           | chicken carcass     | O38:H39              | ESBL <i>blaTEM</i> , risk group 2                                                                                                                                      |
| DSM 103245           | chicken carcass     | O38:H39              | ESBL <i>blaTEM</i> , risk group 2                                                                                                                                      |
| DSM 103246           | chicken carcass     | O186:H34             | ESBL <i>ctxM9</i> , risk group 2                                                                                                                                       |
| DSM 103247           | chicken carcass     | O88:H7               | ESBL <i>blaTEM</i> , risk group 2                                                                                                                                      |
| DSM 103248           | chicken carcass     | O162:H10             | ESBL <i>blaTEM</i> , risk group 2                                                                                                                                      |
| DSM 103249           | chicken carcass     | O <sup>NT</sup> :H10 | ESBL <i>ctxM9</i> + <i>blaTEM</i> , risk group 2                                                                                                                       |
| DSM 103250           | chicken carcass     | O <sup>NT</sup> :H25 | ESBL <i>blaCTX-M1</i> , <i>blaCTX-M15</i> , risk group 2                                                                                                               |
| DSM103251            | chicken carcass     | O91:H7               | ESBL <i>blaCTX-M1</i> , <i>blaCTX-M15</i> , risk group 2                                                                                                               |
| DSM 103252 (ECOR-47) | sheep               | O <sup>NT</sup> :H18 | Group D strain                                                                                                                                                         |
| DSM 103253 (ECOR-72) | human, UTI          | O144:H8              | Group B1 strain                                                                                                                                                        |
| DSM103254            | chicken air sac     | O78++                | APEC; <i>astA</i> -, CDTIII -, CNF1/2 -, FyuA -, <i>irp2</i> -, <i>hlyA</i> -, <i>aer</i> +, <i>tsh</i> +, <i>fimC</i> +, <i>papC</i> +, <i>hlyE</i> -, <i>stx2f</i> - |
| DSM103255            | chicken peritoneum  | O78++                | APEC; <i>astA</i> +, CDTIII -, CNF1/2 -, FyuA +, <i>irp2</i> +, <i>hlyA</i> -, <i>aer</i> +, <i>tsh</i> +, <i>fimC</i> +, <i>papC</i> -, <i>hlyE</i> -, <i>stx2f</i> - |
| DSM103256            | chicken             | O2:K1                | APEC                                                                                                                                                                   |
| DSM103257            | chicken wattle      | O2:K1                | APEC                                                                                                                                                                   |
| DSM103258            | chicken             | O2:K1                | APEC                                                                                                                                                                   |
| DSM103259            | chicken bone marrow | O2                   | APEC                                                                                                                                                                   |
| DSM103260            | chicken heart blood | O1:H <sup>NT</sup>   | APEC; <i>astA</i> +, CDTIII -, CNF1/2 -, FyuA +, <i>irp2</i> +, <i>hlyA</i> -, <i>aer</i> +, <i>tsh</i> +, <i>fimC</i> +, <i>papC</i> +, <i>hlyE</i> -, <i>stx2f</i> - |
| DSM103261            | chicken             | O2:K1                | APEC                                                                                                                                                                   |
| DSM103262            | chicken             | O1:K1                | APEC                                                                                                                                                                   |
| DSM103263            | chicken heart blood | O78:K80              | APEC; <i>aerA</i> +, <i>tsh</i> +                                                                                                                                      |
| DSM103264            | chicken             | O1:K1                | APEC                                                                                                                                                                   |
| DSM103265            | dove                | O1:H15               | APEC; Col-, Hly-,                                                                                                                                                      |
| DSM103266            | chicken             | O2                   | APEC; <i>astA</i> -, <i>iss</i> +, <i>irp2</i> +, <i>papC</i> -, <i>iucD</i> +, <i>tsh</i> +, <i>vat</i> -, <i>cvi/cva</i> +                                           |
| DSM103266            | chicken             | O2                   | APEC; <i>astA</i> -, <i>iss</i> +, <i>irp2</i> +, <i>papC</i> -, <i>iucD</i> +, <i>tsh</i> +, <i>vat</i> -, <i>cvi/cva</i> +                                           |

(NM = non motile, NT = non-typeable, ND = no data)

**Table S2.** *Klebsiella* strains and growth conditions used for host spectrum analyses of phage KWBSE43-6 and Goslar

| strain                 | species                                               | medium                                  | temperature<br>[°C] |
|------------------------|-------------------------------------------------------|-----------------------------------------|---------------------|
| DSM 16963              | <i>Klebsiella oxytoca</i>                             | 1.5% Peptone from casein                | 30                  |
|                        |                                                       | 0.5% Peptone from soymeal               |                     |
|                        |                                                       | 0.5% NaCl (0.3/1.5% Agar)               |                     |
| DSM 103516-103525      | <i>Klebsiella pneumoniae</i>                          |                                         | 30                  |
| DSM 103700, DSM 103696 | <i>Klebsiella pneumoniae</i> subsp. <i>pneumoniae</i> | 0.5% Peptone                            | 28                  |
| DSM 102039, DSM 102040 | <i>Klebsiella pneumoniae</i>                          | 0.3% Meat extract (0.3/1.5% Agar)       |                     |
| DSM 25736, DSM 5175    | <i>Klebsiella oxytoca</i>                             |                                         |                     |
| DSM 29417              | <i>Klebsiella pneumoniae</i>                          |                                         | 37                  |
| DSM 24121              | <i>Klebsiella oxytoca</i>                             | 3% Trypticase Soy Broth (0.3/1.5% Agar) |                     |

**Table S3.** Additional information on phages isolated in this study

| phage   | <i>E. coli</i> strain used for isolation/propagation (DSM) | origin        | geographical origin | date of isolation |
|---------|------------------------------------------------------------|---------------|---------------------|-------------------|
| Goslar  | 103255                                                     | duck feces    | Goslar              | May 16            |
| D5505   | 101114                                                     | surface water | Braunschweig        | Nov 15            |
| EdH4    | 498                                                        | duck feces    | Braunschweig        | Feb 16            |
| G10400  | 103266                                                     | pig manure    | Hameln              | Aug 16            |
| G17     | 103244                                                     | pig manure    | Hameln              | Aug 16            |
| G2133   | 103254                                                     | pig manure    | Hameln              | Aug 16            |
| G2248   | 103255                                                     | pig manure    | Hameln              | Aug 16            |
| G2285   | 103256                                                     | pig manure    | Hameln              | Aug 16            |
| G2469   | 103258                                                     | pig manure    | Hameln              | Aug 16            |
| G2494   | 103259                                                     | pig manure    | Hameln              | Aug 16            |
| G2540   | 103260                                                     | pig manure    | Hameln              | Aug 16            |
| G2540-3 | 103260                                                     | pig manure    | Hameln              | Aug 16            |
| G29     | 103247                                                     | pig manure    | Hameln              | Aug 16            |
| G37-3   | 103248                                                     | pig manure    | Hameln              | Aug 16            |
| G4498   | 103261                                                     | pig manure    | Hameln              | Aug 16            |

|                |        |               |              |        |
|----------------|--------|---------------|--------------|--------|
| G4500          | 103262 | pig manure    | Hameln       | Aug 16 |
| G4507          | 103263 | pig manure    | Hameln       | Aug 16 |
| G50            | 103250 | pig manure    | Hameln       | Aug 16 |
| G5211          | 103264 | pig manure    | Hameln       | Aug 16 |
| G53            | 103251 | pig manure    | Hameln       | Aug 16 |
| G8             | 103243 | pig manure    | Hameln       | Aug 16 |
| G9062          | 103265 | pig manure    | Hameln       | Aug 16 |
| HdK5           | 498    | chicken feces | Seggebruch   | Feb 16 |
| KAW1E185       | 103253 | clinical      | Braunschweig | Apr 16 |
|                |        | wastewater    |              |        |
| KAW3E185       | 103253 | clinical      | Braunschweig | Apr 16 |
|                |        | wastewater    |              |        |
| KWBSE43-6      | 103249 | sewage        | Braunschweig | Jun 17 |
| MM02           | 498    | duck feces    | Braunschweig | Aug 14 |
| OE5505         | 101114 | surface water | Braunschweig | Nov 15 |
| R5505          | 101114 | surface water | Braunschweig | Nov 15 |
| Schickermooser | 103260 | chicken feces | Arnsberg     | May 16 |
| WFbE185        | 103253 | sewage        | Wolfenbüttel | Feb 16 |
| WFC            | 101121 | sewage        | Wolfenbüttel | Dec 15 |
| WFH            | 101139 | sewage        | Wolfenbüttel | Dec 15 |
| WFK            | 101124 | sewage        | Wolfenbüttel | Nov 15 |
| WFL6982        | 101124 | sewage        | Wolfenbüttel | Nov 15 |
| KAW1A4500      | 103262 | clinical      | Braunschweig | Apr 16 |
|                |        | wastewater    |              |        |
| PTXU04         | 613    | sewage        | Wolfenbüttel | Jan 14 |
| R4596          | 101113 | surface water | Braunschweig | Nov 15 |
| WFI101126      | 101126 | sewage        | Wolfenbüttel | Nov 15 |
| EASG3          | 498    | duck feces    | Goslar       | Feb 16 |
| G29-2          | 103247 | pig manure    | Hameln       | Aug 16 |
| HASG4          | 498    | chicken feces | Goslar       | Feb 16 |
| HdH2           | 498    | chicken feces | Braunschweig | Feb 16 |
| HDK1           | 498    | chicken feces | Seggebruch   | Feb 16 |
| HdSG1          | 498    | chicken feces | Goslar       | Feb 16 |
| MM01           | 498    | horse feces   | Braunschweig | Aug 14 |
| PTXU06         | 498    | sewage        | Braunschweig | Jan 14 |
| VAH1           | 498    | budgie        | Braunschweig | Feb 16 |
|                |        | droppings     |              |        |
| WFI            | 103252 | sewage        | Wolfenbüttel | Feb 16 |
| WF5505         | 101114 | sewage        | Wolfenbüttel | Nov 15 |

**Table S4.** Morphological and genomic features of isolated phages of this study

| Phage            | Morphotype | ICTV genus                  | genome size (bp) | CDS | tRNAs | GC content (%) | coding (%) | length TR (bp) | coverage | GenBank acc. no. |
|------------------|------------|-----------------------------|------------------|-----|-------|----------------|------------|----------------|----------|------------------|
| vB_EcoM_Goslar   | Myovirus   | proposed <i>Goslarvirus</i> | 237,307          | 247 | -     | 46.53          | 93.2       | -              | 99.1     | MK327938         |
| vB_EcoM_D5505    | Myovirus   | <i>Tequatrovirus</i>        | 168,409          | 271 | 11    | 35.39          | 93.8       | -              | 40.6     | MK327929         |
| vB_EcoM_EdH4     | Myovirus   | <i>Vequintavirus</i>        | 136,031          | 214 | 7     | 43.65          | 90.7       | 458            | 700      | MK327930         |
| vB_EcoM_G10400   | Myovirus   | <i>Tequatrovirus</i>        | 170,182          | 278 | 7     | 35.29          | 95.0       | -              | 300.9    | MK327937         |
| vB_EcoM_G17      | Myovirus   | <i>Asteriusvirus</i>        | 370,817          | 659 | 7     | 34.33          | 91.1       | 20,649         | 203.6    | MK327931         |
| vB_EcoM_G2133    | Myovirus   | <i>Tequatrovirus</i>        | 168,959          | 275 | 8     | 35.33          | 95.2       | -              | 63.2     | MK327928         |
| vB_EcoM_G2248    | Myovirus   | <i>Krischvirus</i>          | 170,678          | 277 | -     | 40.52          | 94.9       | -              | 186.7    | MK327932         |
| vB_EcoM_G2285    | Myovirus   | <i>Mosigvirus</i>           | 166,675          | 267 | 2     | 37.54          | 94.7       | -              | 295.5    | MK327933         |
| vB_EcoM_G2469    | Myovirus   | <i>Mosigvirus</i>           | 170,452          | 273 | 2     | 37.57          | 94.2       | -              | 429.3    | MK327934         |
| vB_EcoM_G2494    | Myovirus   | <i>Krischvirus</i>          | 168,327          | 281 | -     | 40.32          | 94.1       | -              | 51.6     | MK327935         |
| vB_EcoM_G2540    | Myovirus   | <i>Tequatrovirus</i>        | 168,886          | 273 | 8     | 35.36          | 94.8       | -              | 536.6    | MK327936         |
| vB_EcoM_G2540-3  | Myovirus   | <i>Tequatrovirus</i>        | 168,654          | 276 | 8     | 35.33          | 94.8       | -              | 409.9    | MK327944         |
| vB_EcoM_G29      | Myovirus   | <i>Tequatrovirus</i>        | 168,241          | 276 | 12    | 35.33          | 94.5       | -              | 91.7     | MK327940         |
| vB_EcoM_G37-3    | Myovirus   | <i>Krischvirus</i>          | 167,832          | 283 | -     | 40.33          | 93.9       | -              | 456.2    | MK327941         |
| vB_EcoM_G4498    | Myovirus   | <i>Tequatrovirus</i>        | 167,826          | 280 | 10    | 35.46          | 95.2       | -              | 186.6    | MK327939         |
| vB_EcoM_G4500    | Myovirus   | <i>Tequatrovirus</i>        | 168,363          | 279 | 12    | 35.32          | 94.7       | -              | 497.8    | MK327945         |
| vB_EcoM_G4507    | Myovirus   | <i>Tequatrovirus</i>        | 168,828          | 274 | 12    | 35.37          | 94.6       | -              | 381.7    | MK327946         |
| vB_EcoM_G50      | Myovirus   | <i>Tequatrovirus</i>        | 167,728          | 267 | 11    | 35.52          | 94.5       | -              | 409.9    | MK327942         |
| vB_EcoM_G5211    | Myovirus   | <i>Krischvirus</i>          | 164,278          | 270 | -     | 40.44          | 94.0       | -              | 478.2    | MK327947         |
| vB_EcoM_G53      | Myovirus   | <i>Mosigvirus</i>           | 167,834          | 273 | 2     | 37.75          | 95.0       | -              | 258.6    | MK327943         |
| vB_EcoM_G8       | Myovirus   | <i>Tequatrovirus</i>        | 169,65           | 268 | 8     | 35.33          | 94.4       | -              | 606.5    | MK373787         |
| vB_EcoM_G9062    | Myovirus   | <i>Tequatrovirus</i>        | 168,67           | 276 | 11    | 35.3           | 94.8       | -              | 38.7     | MK373779         |
| vB_EcoM_HdK5     | Myovirus   | <i>Vequintavirus</i>        | 139,328          | 225 | 7     | 43.63          | 90.5       | 458            | 424.3    | MK373780         |
| vB_EcoM_KAW1E185 | Myovirus   | <i>Tequatrovirus</i>        | 164,987          | 274 | 10    | 35.37          | 95.0       | -              | 506.3    | MK373781         |

|                        |            |                                   |         |     |    |       |      |        |        |          |
|------------------------|------------|-----------------------------------|---------|-----|----|-------|------|--------|--------|----------|
| vB_EcoM_KAW3E185       | Myovirus   | <i>Mosigvirus</i>                 | 170,187 | 275 | 2  | 37.55 | 95.0 | -      | 60.7   | MK373782 |
| vB_EcoM_KWBSE43-6      | Myovirus   | proposed <i>Taipeivirus</i>       | 158,607 | 222 | 7  | 46.09 | 92.9 | -      | 51.2   | MK373783 |
| vB_EcoM_MM02           | Myovirus   | <i>Mosigvirus</i>                 | 169,201 | 274 | 2  | 37.6  | 95.0 | -      | 272.9  | MK373784 |
| vB_EcoM_OE5505         | Myovirus   | <i>Tequatrovirus</i>              | 168,756 | 282 | 9  | 35.22 | 95   | -      | 74.1   | MK373785 |
| vB_EcoM_R5505          | Myovirus   | <i>Tequatrovirus</i>              | 167,317 | 279 | 11 | 35.36 | 95.2 | -      | 133.1  | MK373786 |
| vB_EcoM_Schickermooser | Myovirus   | proposed<br><i>Phapocotavirus</i> | 151,194 | 284 | 10 | 39.01 | 91.3 | 328    | 346.2  | MK373788 |
| vB_EcoM_WFbE185        | Myovirus   | <i>Mosigvirus</i>                 | 170,429 | 277 | 2  | 37.6  | 95.1 | -      | 189.9  | MK373778 |
| vB_EcoM_WFC            | Myovirus   | proposed <i>Wifcevirus</i>        | 72,472  | 113 | -  | 46.01 | 90.6 | 3,783  | 319.8  | MK373777 |
| vB_EcoM_WFH            | Myovirus   | proposed <i>Wifcevirus</i>        | 71,283  | 106 | -  | 46.12 | 90.2 | 3,7    | 416.5  | MK373776 |
| vB_EcoM_WFK            | Myovirus   | <i>Mosigvirus</i>                 | 164,59  | 262 | 3  | 37.58 | 94.7 | -      | 455.1  | MK373775 |
| vB_EcoM_WFL6982        | Myovirus   | <i>Mosigvirus</i>                 | 164,279 | 261 | 3  | 37.56 | 94.8 | -      | 173.9  | MK373774 |
| vB_EcoP_KAW1A4500      | Podovirus  | <i>Zindervirus</i>                | 44,241  | 58  | -  | 45.18 | 90.5 | 266    | 774.2  | MK373773 |
| vB_EcoP_PTXU04         | Podovirus  | proposed<br><i>Xuquatrovirus</i>  | 61,6    | 92  | -  | 52.84 | 96.4 | -      | 175.4  | MK373772 |
| vB_EcoP_R4596          | Podovirus  | <i>Zindervirus</i>                | 45,13   | 51  | -  | 44.84 | 91.7 | 428    | 953.3  | MK373771 |
| vB_EcoP_WFI101126      | Podovirus  | <i>Kuravirus</i>                  | 77,307  | 135 | 1  | 42.07 | 90.2 | -      | 97.9   | MK373770 |
| vB_EcoS_EASG3          | Siphovirus | <i>Tequintavirus</i>              | 120,715 | 179 | 23 | 39.04 | 84.8 | 10,226 | 591.4  | MK373799 |
| vB_EcoS_G29-2          | Siphovirus | <i>Tunavirus</i>                  | 51,739  | 85  | -  | 44.02 | 90.3 | -      | 625.3  | MK373798 |
| vB_EcoS_HASG4          | Siphovirus | <i>Tequintavirus</i>              | 120,603 | 178 | 23 | 39.02 | 84.3 | 10,265 | 599.4  | MK373797 |
| vB_EcoS_HdH2           | Siphovirus | <i>Tequintavirus</i>              | 120,12  | 178 | 24 | 39.32 | 85.4 | 10,165 | 393.6  | MK373796 |
| vB_EcoS_HDK1           | Siphovirus | <i>Nonagvirus</i>                 | 64,059  | 100 | -  | 44.07 | 89.8 | 3,48   | 228.7  | MK373794 |
| vB_EcoS_HdSG1          | Siphovirus | <i>Nonagvirus</i>                 | 63,595  | 93  | -  | 43.87 | 91.1 | 3,362  | 88.1   | MK373795 |
| vB_EcoS_MM01           | Siphovirus | <i>Rtpvirus</i>                   | 43,157  | 68  | 1  | 43.77 | 92.2 | -      | 173.5  | MK373793 |
| vB_EcoS_PTXU06         | Siphovirus | <i>Dhillonvirus</i>               | 42,321  | 63  | -  | 54.44 | 92.1 | -      | 1819.6 | MK373789 |
| vB_EcoS_VAH1           | Siphovirus | <i>Dhillonvirus</i>               | 124,537 | 208 | 21 | 38.61 | 86.7 | 11,708 | 850.5  | MK373792 |
| vB_EcoS_WFI            | Siphovirus | <i>Dhillonvirus</i>               | 45,536  | 61  | -  | 54.57 | 92.5 | -      | 660.4  | MK373791 |
| vB_EcoS_WF5505         | Siphovirus | <i>Dhillonvirus</i>               | 47,082  | 67  | -  | 54.3  | 93.0 | 2,025  | 442.9  | MK373790 |

**Table S6.** Mascot research results for peptide fingerprinting analysis of structural proteins of phages PTXU04 and Goslar

| #analysed band | ID           | Description                   | Score | Expect   | Coverage (%) | #Peptides | Mass (Da) |
|----------------|--------------|-------------------------------|-------|----------|--------------|-----------|-----------|
| 1              | PTXU04_00007 | hypothetical protein          | 66    | 0.00015  | 7            | 6         | 89168     |
| 2              | PTXU04_00010 | putative major capsid protein | 192   | 3.7e-017 | 52           | 14        | 36442     |
| 3              | PTXU04_00010 | putative major capsid protein | 70    | 5.4e-005 | 26           | 8         | 36442     |
|                | PTXU04_00024 | hypothetical protein          | 171   | 4.7e-015 | 56           | 16        | 30776     |
| 4              | PTXU04_00012 | hypothetical protein          | 58    | 0.001    | 63           | 3         | 13847     |
| 5              | PTXU04_00011 | hypothetical protein          | 74    | 2.6e-005 | 71           | 5         | 7076      |
| 1              | Goslar_00217 | hypothetical protein          | 215   | 1.92-019 | 25           | 19        | 76826     |
| 2              | Goslar_00041 | hypothetical protein          | 219   | 7.4e-020 | 28           | 25        | 83540     |
| 3              | Goslar_00247 | hypothetical protein          | 81    | 5.1e-006 | 31           | 11        | 50985     |
| 4              | Goslar_00060 | hypothetical protein          | 49    | 0.0074   | 26           | 7         | 34049     |
| 5              | Goslar_00218 | hypothetical protein          | 82    | 4.6e-006 | 52           | 9         | 33055     |
| 6              | Goslar_00022 | hypothetical protein          | 143   | 3e-012   | 65           | 14        | 32458     |
| 7              | Goslar_00058 | hypothetical protein          | 114   | 2.4e-009 | 28           | 10        | 47103     |
| 8              | Goslar_00061 | hypothetical protein          | 54    | 0.0023   | 15           | 6         | 40210     |
|                | Goslar_00247 | hypothetical protein          | 42    | 0.035    | 17           | 5         | 31408     |
| 9              | Goslar_00023 | hypothetical protein          | 81    | 4.4e-006 | 37           | 5         | 19113     |

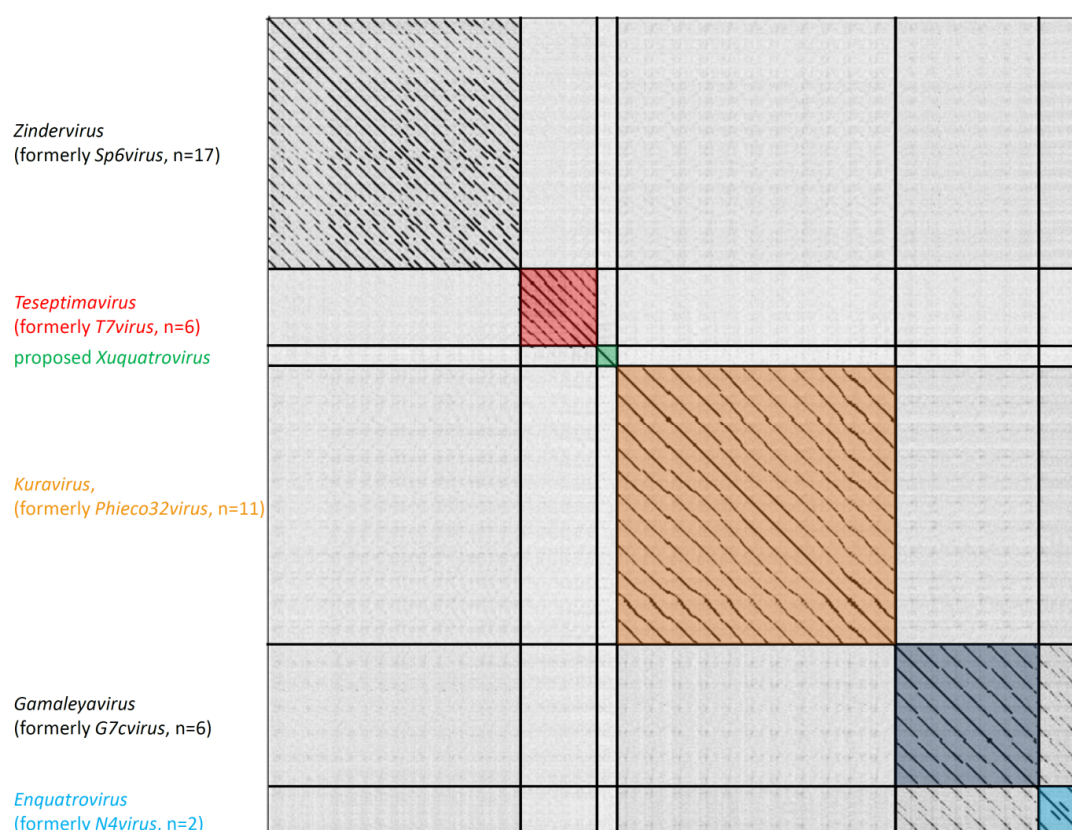

Suppl. Figure S1 Dot plot analysis of genomes of isolated podoviruses of this study compared to related genomes and further members of different genera of the *Podoviridae* family. Genomes were colinearized before analysis. Figure was generated using GEPARD.



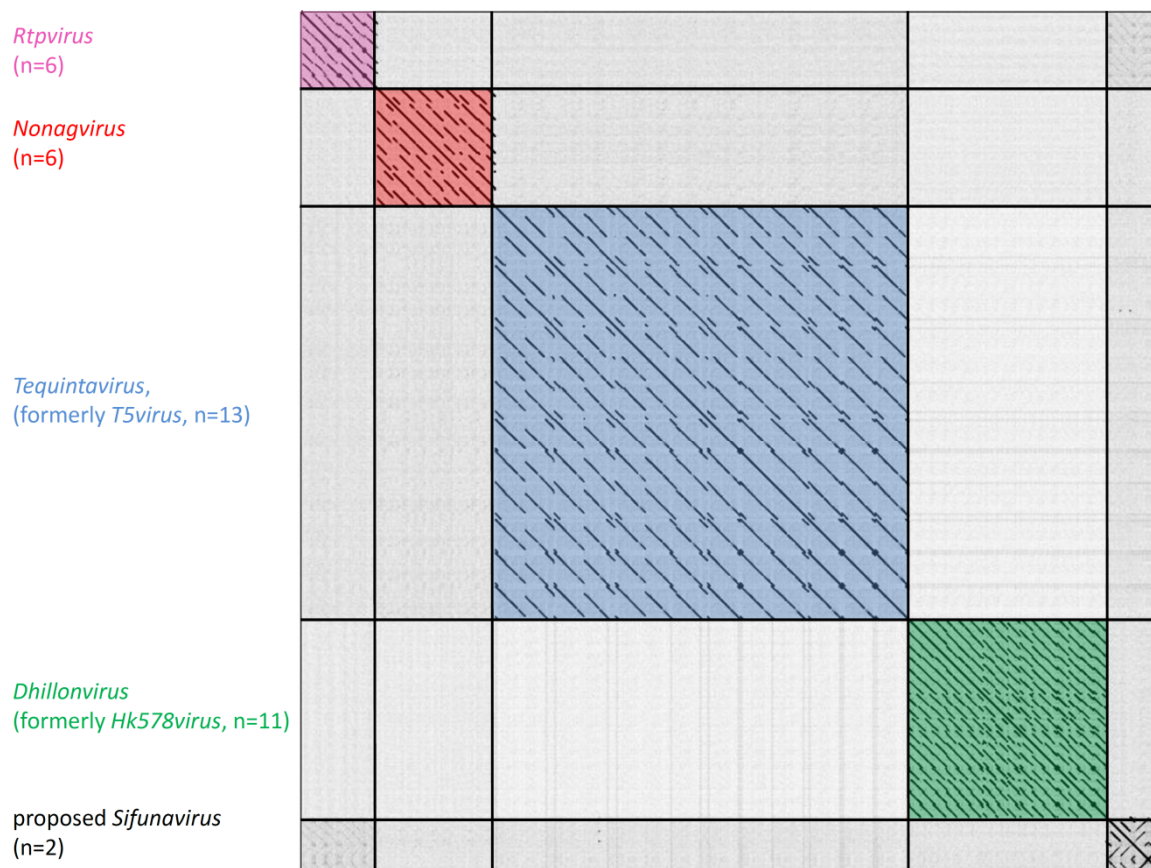

Suppl. Figure S2 Dot plot analysis of genomes of isolated siphoviruses of this study compared to related genomes and further members of different genera of the *Siphoviridae* family. Genomes were colinearized before analysis. Figure was generated using GEPARD.

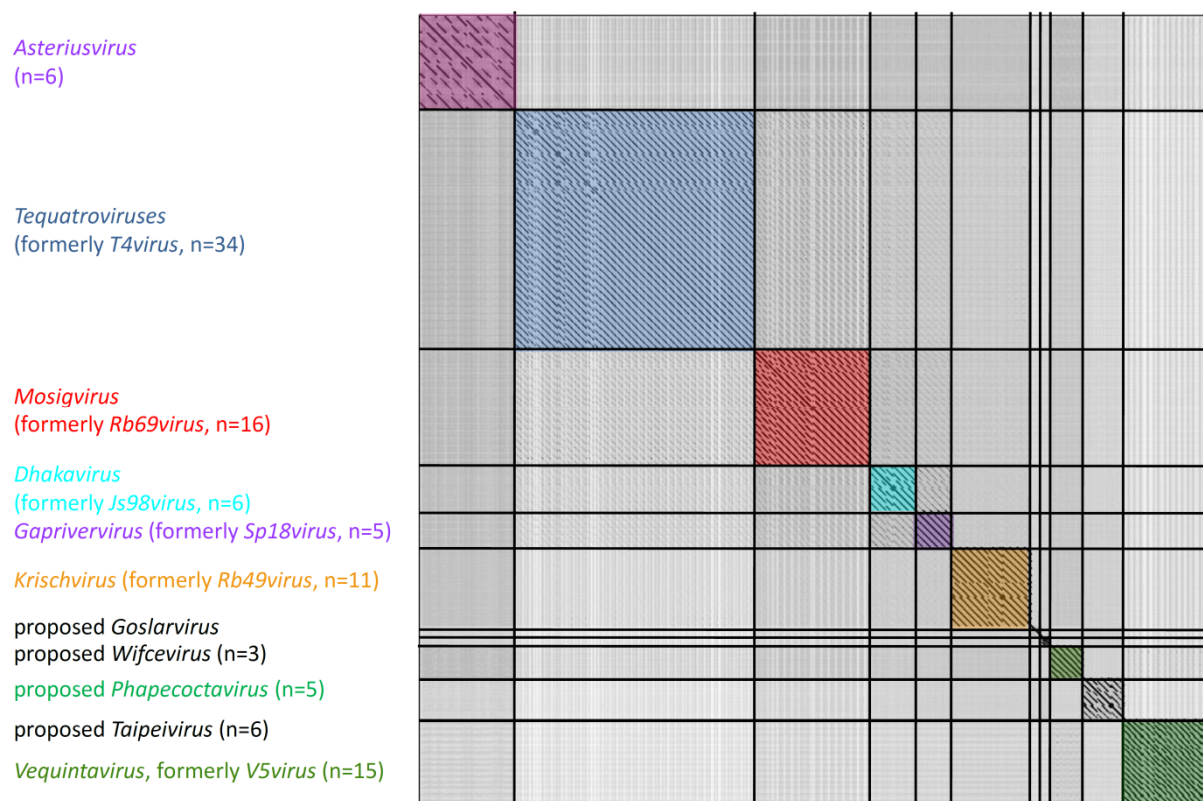

Suppl. Figure S3 Dot plot analysis of genomes of isolated myoviruses of this study compared to related genomes. Genomes were colinearized before analysis. Figure was generated using GEPARD.

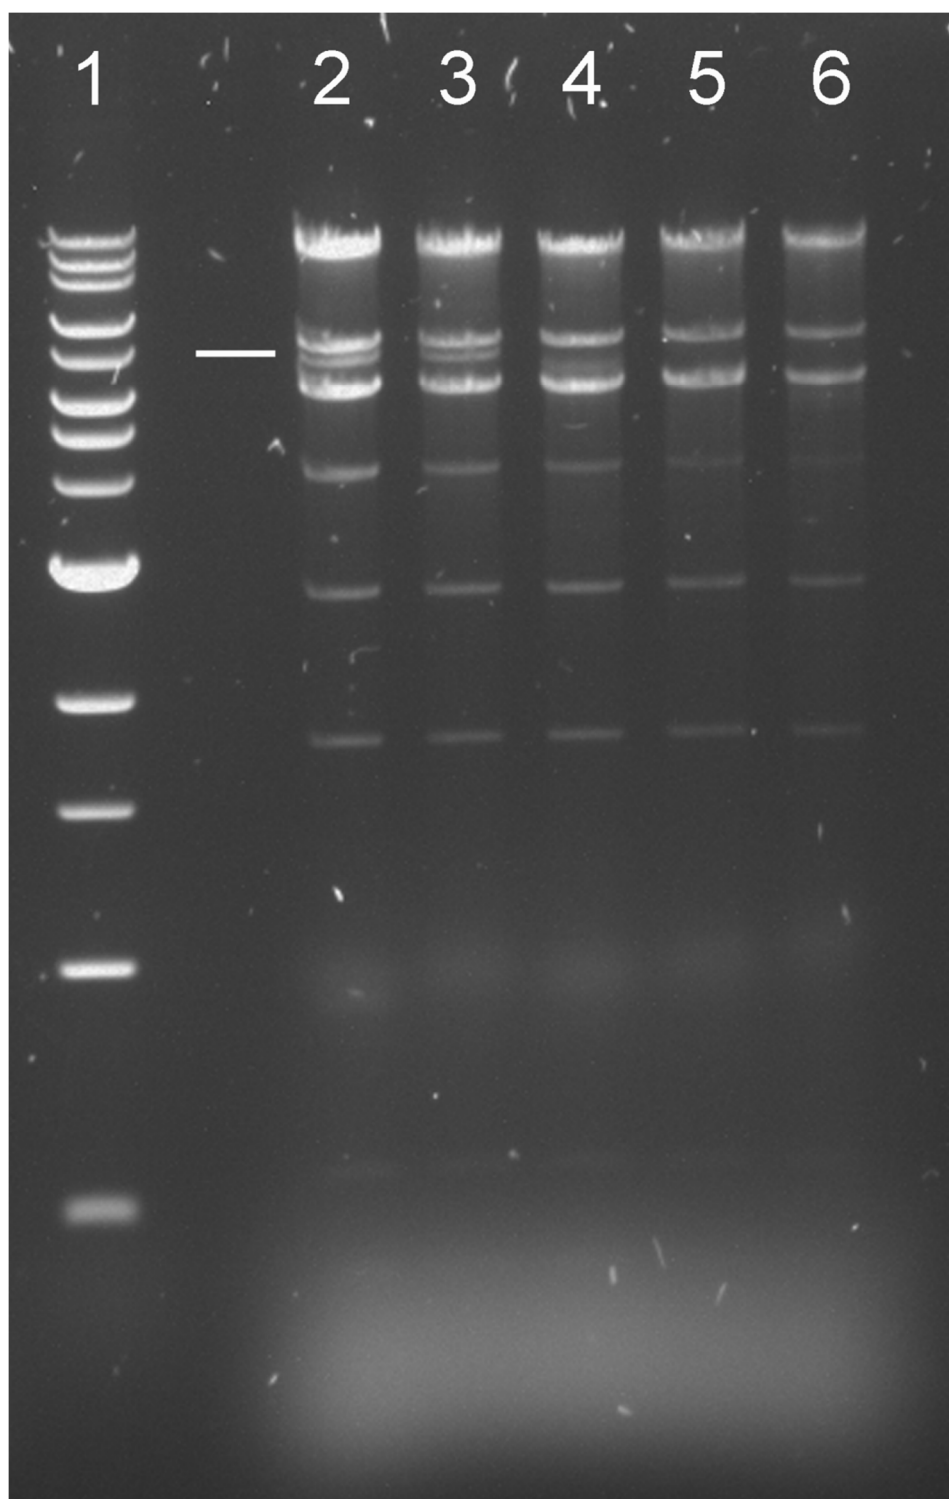

Suppl. Figure S4 Time-limited digestion of genomic DNA of phage PTXU04 with BAL 31, followed by complete hydrolysis with BglI. Lane 1, Marker (Quick load 1kb Extended, Bio labs); lane 2–6, DNA of PTXU04 hydrolyzed with BAL 31 followed by BglI. BAL 31 digestion time: lane 2, 0 min; lane 3, 15 min; lane 4, 30 min; lane 5, 45 min. lane 6, 60 min. 1% agarose gel. Band representing predicted and degraded end is marked.

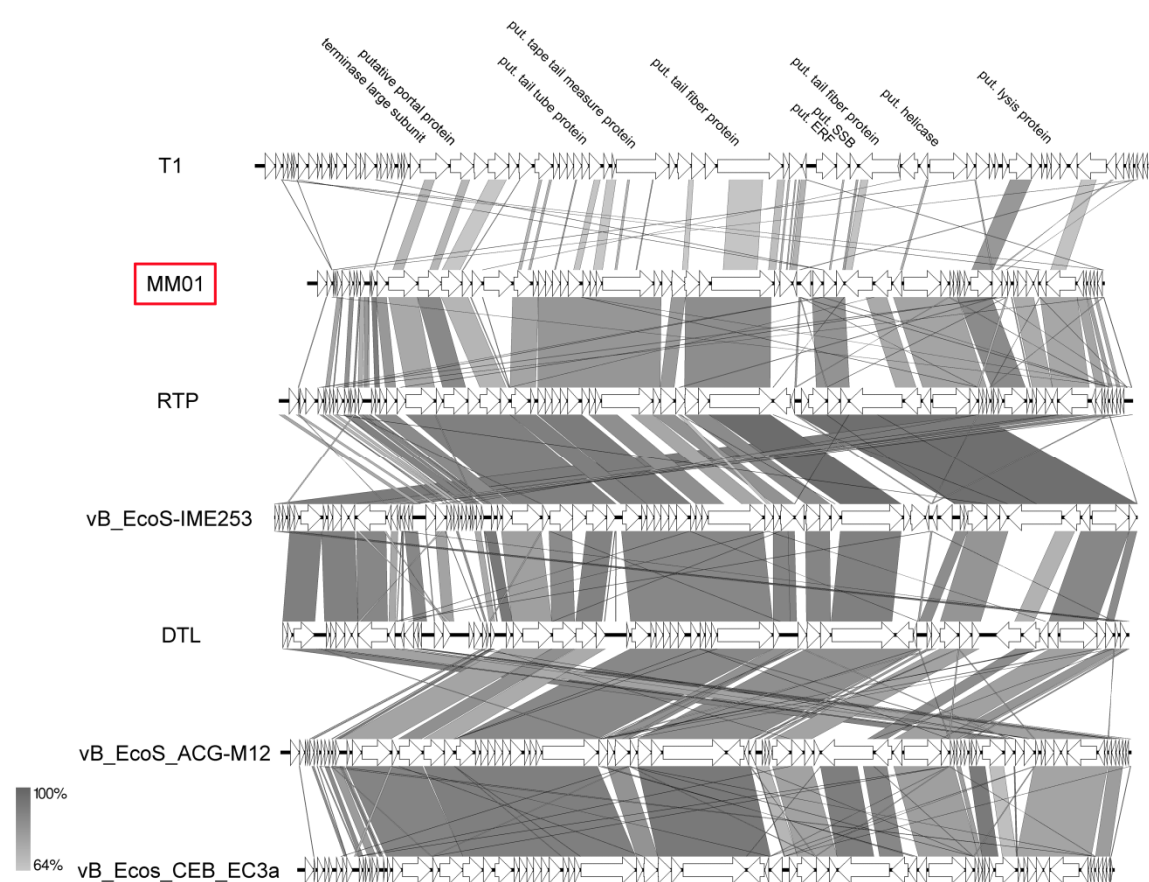

Suppl. Figure S5. Synteny plot of phage MM01 compared to related phages of the rtpviruses and phage T1 at the nucleotide level. Figure was generated with EasyFig, isolate of this study is marked in red.

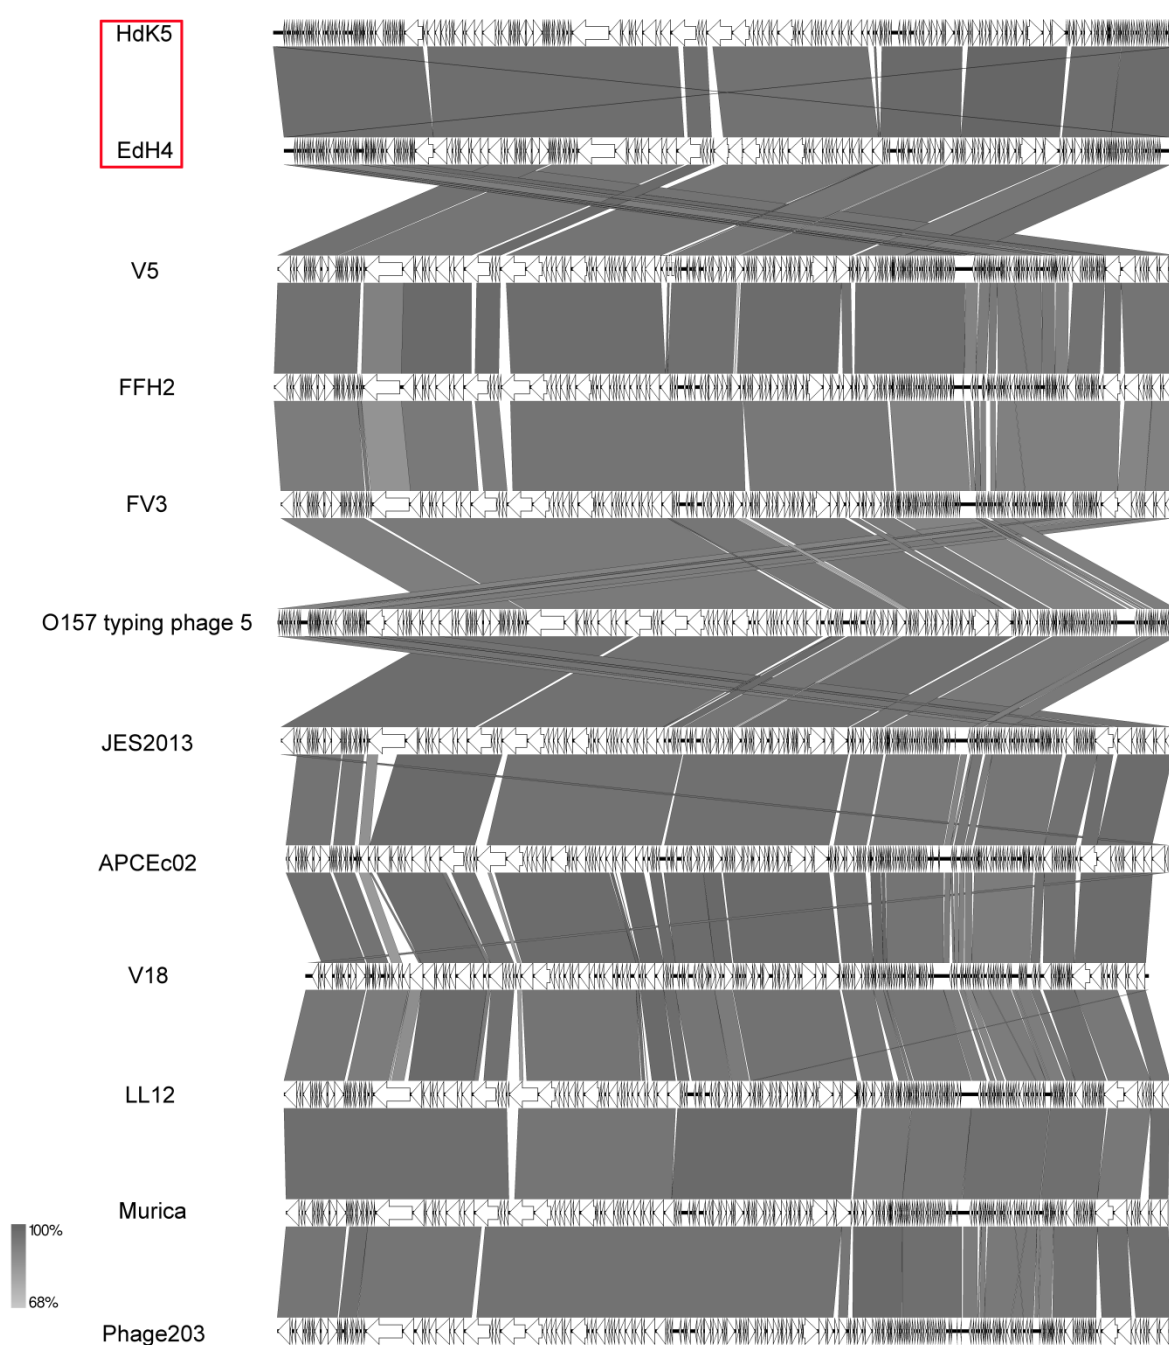

Suppl. Fig S6. Genomic organization of phages EdH4 and Hdk5 compared to related viruses at the nucleotide level. Figure was generated with EasyFig, isolate of this study is marked in red.



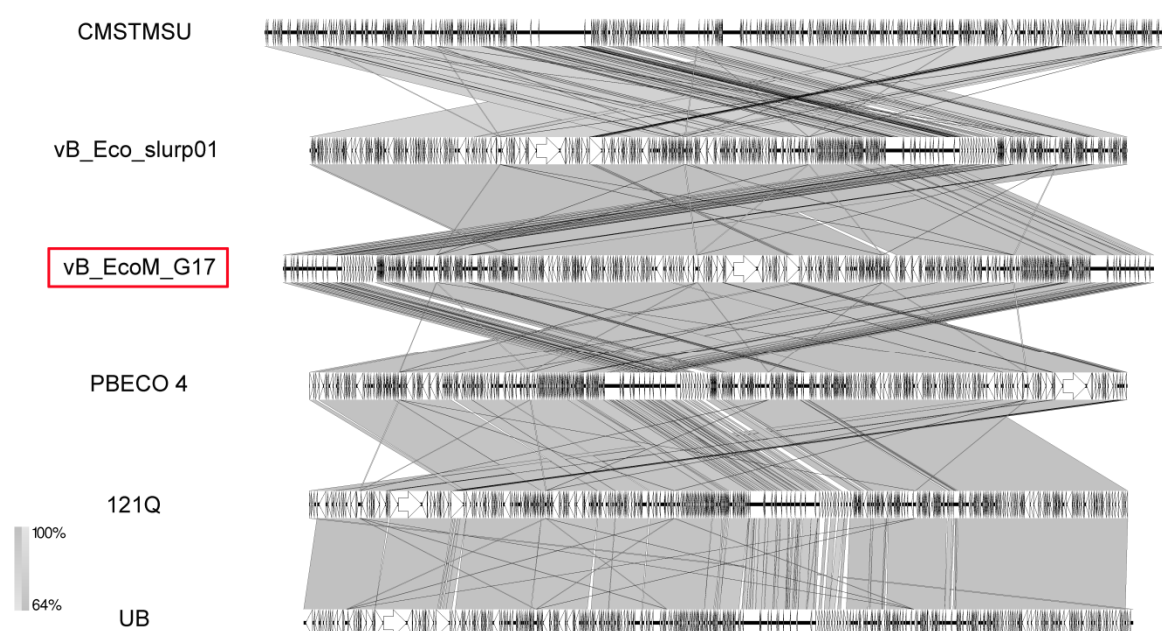

Suppl. Fig S7. Synteny plot of phage G17 compared to related asteriuseviruses at the nucleotide level. Figure was generated with EasyFig, isolate of this study is marked in red.

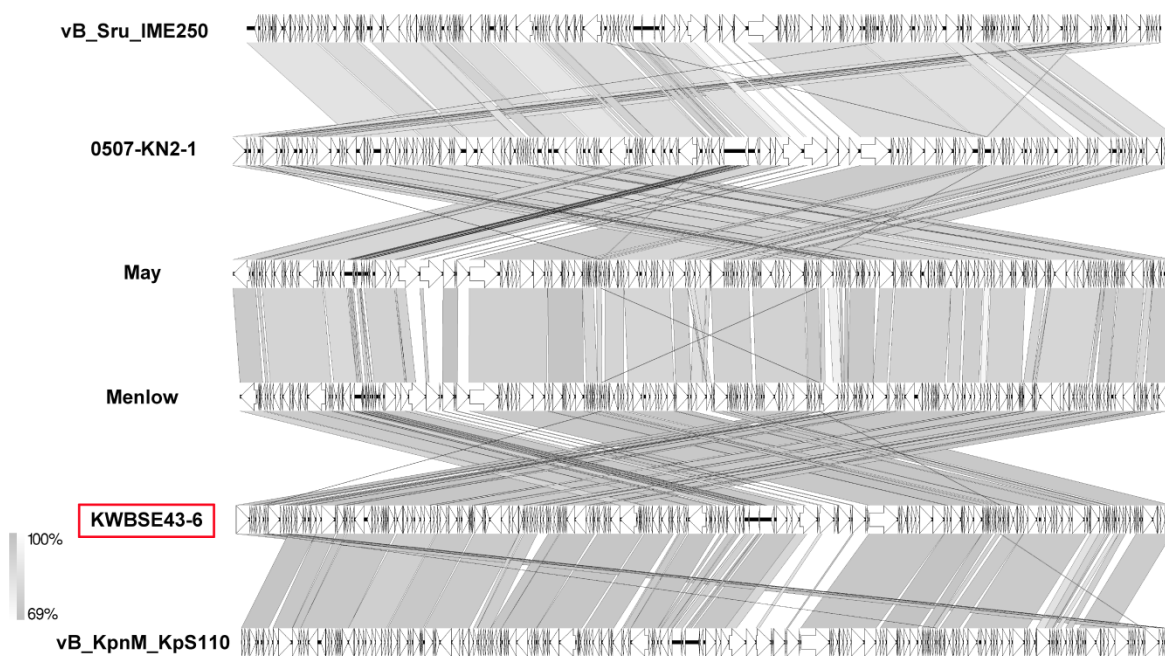

Suppl. Fig S8. Genome organization of phage KWBSE43-6 compared to related phages at the nucleotide level. Figure was generated with EasyFig, isolate of this study is marked in red.

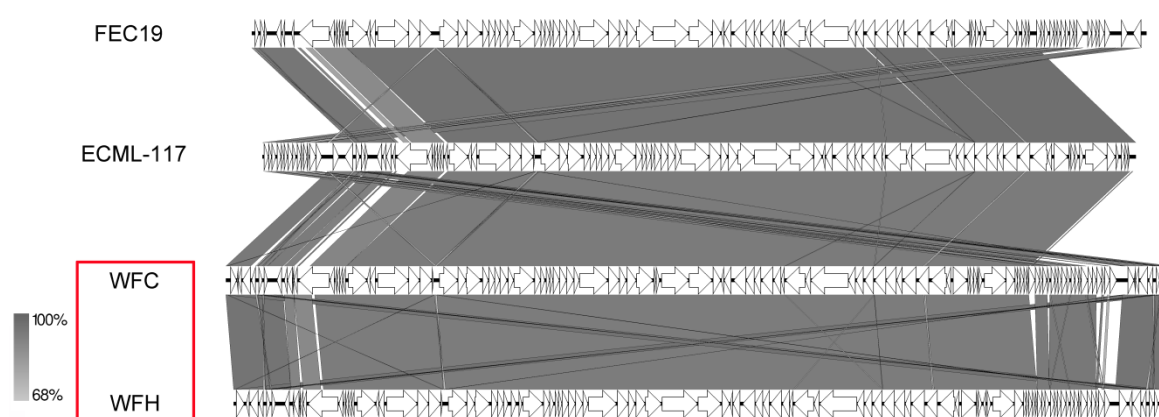

Suppl. Fig S9. Synteny plot of phage WFC and WFH compared to related phages at the nucleotide level. Figure was generated with EasyFig, isolates of this study are marked in red.

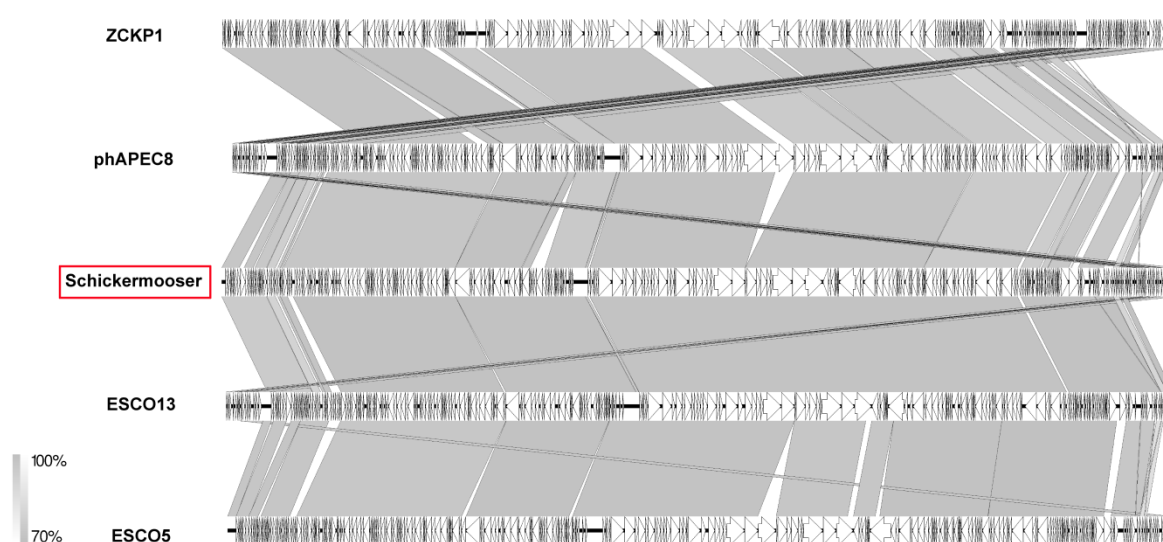

Suppl. Fig S10. Synteny plot of phage Schickermooser compared to related phages at the nucleotide level. Figure was generated with EasyFig, isolate of this study is marked in red.
